# Supplementary material for: Adeno-associated viral vectors for functional intravenous gene transfer throughout the non-human primate brain
Source: PubMed Central journal article supplement (PMC10575780; doi:10.1038/s41565-023-01419-x), 2023-07-10
Supplement: 41565_2023_1419_MOESM1_ESM.pdf [file 41565_2023_1419_MOESM1_ESM.pdf]

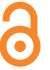

# **Adeno-associated viral vectors for functional intravenous gene transfer throughout the non-human primate brain**

---

In the format provided by the authors and unedited

**Supplementary Fig. 1: Generating AAV libraries and choosing variants for further characterization.**

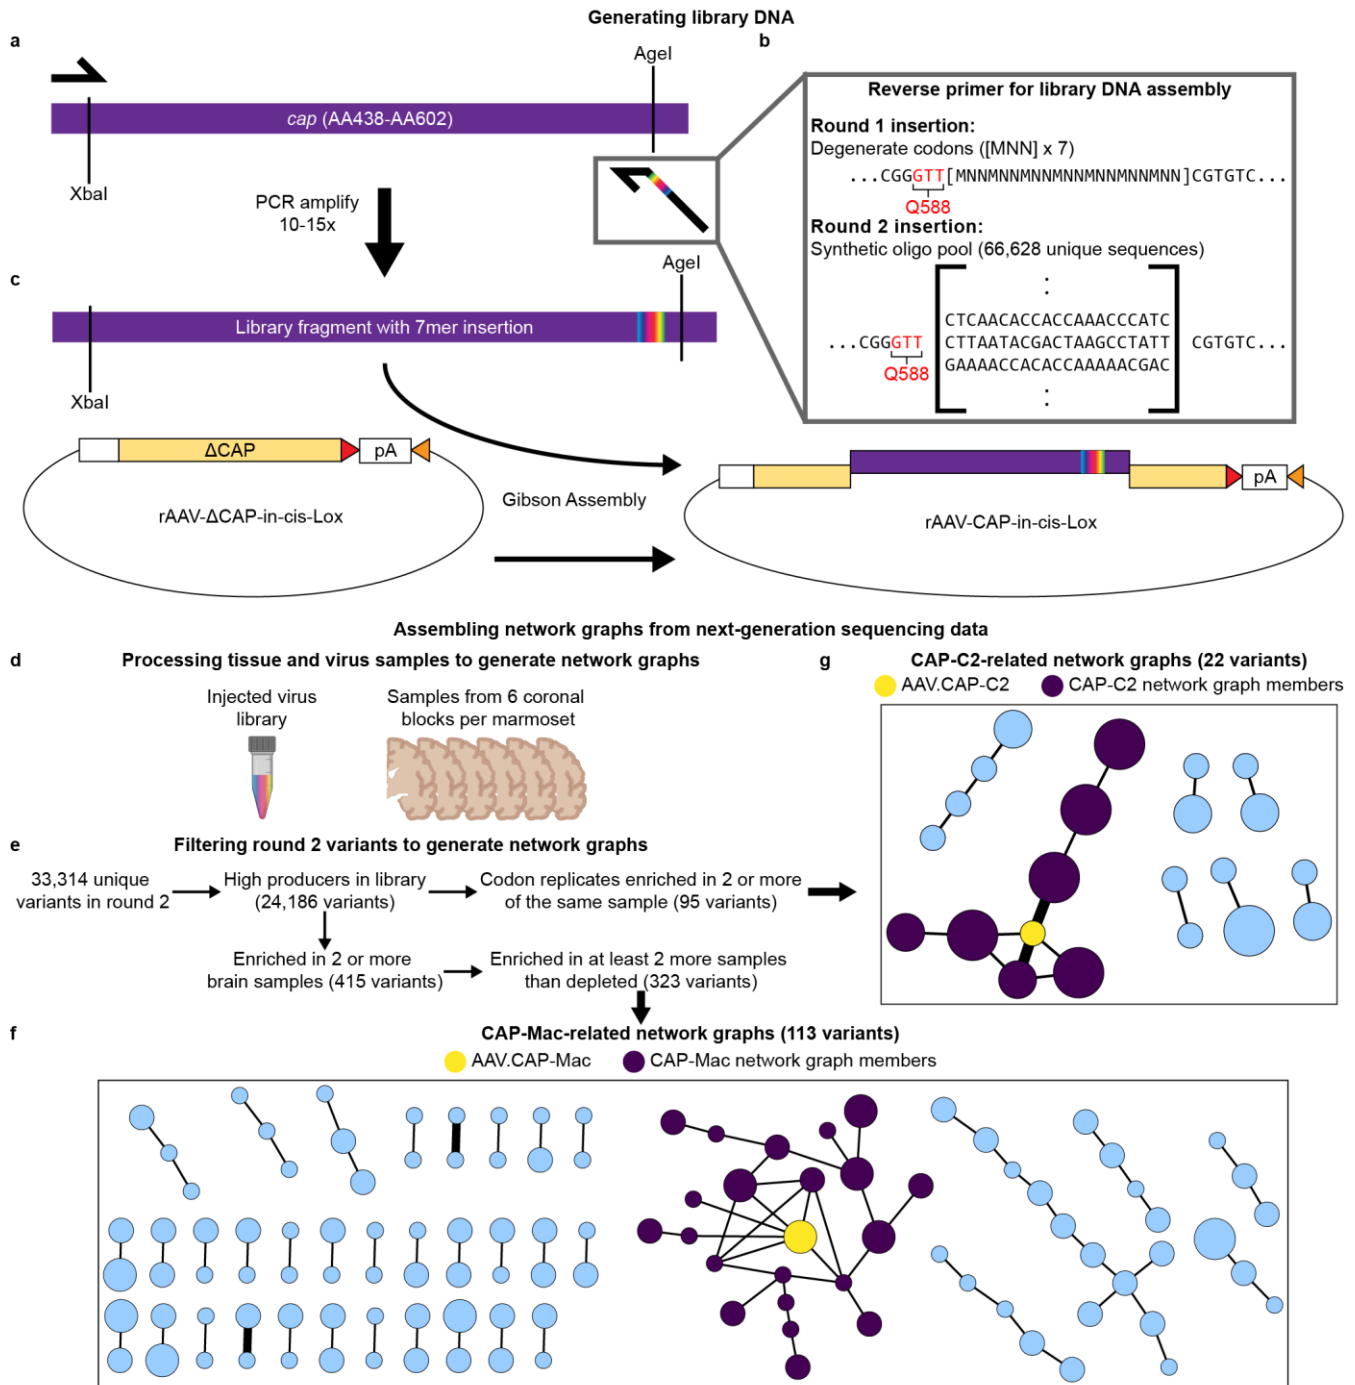

**Supplementary Fig. 1: Generating AAV libraries and choosing variants for further characterization.** **a**, We introduced diversity into the AAV9 *cap* genome using a reverse primer with a 21-nucleotide insertion after Q588. The reverse primer was used to generate a PCR fragment approximately spanning the XbaI to AgeI sites of the modified *cap* gene (approximately AA438 to AA602). **b**, For DNA assembly for round 1 selections, the reverse primer contained 7 degenerate codons ([MNN] x 7). For round 2 selections, we used a synthetic oligo pool to specify each 21 bp sequence that we inserted into *cap*. **c**, The PCR-amplified fragment contained homologous regions that overlap with the rAAV-

$\Delta$ CAP-in-cis-Lox digested plasmid, and the two fragments were assembled using Gibson assembly to create the final assembled library DNA. **d-g**, Process to assemble network graphs from next-generation sequencing data. While our previous CREATE-based selections have relied on Cre-transgenic mouse lines to increase selection stringency, Cre-transgenic marmosets are currently unavailable, and we were unable to confer this additional selective pressure during selections. We reasoned that through this clustering analysis, we could efficiently and productively sample variants from our selections to (1) limit the number of animals used for individual characterization and (2) partially overcome the absence of the selective pressure provided by Cre-transgenic mice in CREATE. **d**, To generate network graphs, we processed the injected virus library and sampled from each of the 6 brain sections from each animal. **e**, From our next-generation sequencing data, we calculated library enrichment scores and filtered the variants using two separate criteria. **f, g**, Network graphs for AAV.CAP-Mac (**f**) and AAV.CAP-C2 (**g**). CAP-Mac and CAP-C2 were both chosen because they were the most interconnected nodes within their respective networks. Each node represents a unique variant recovered from the round 2 selection and each edge represents pairwise reverse Hamming distance  $\geq 3$ .

**Supplementary Table 1: Summary of CAP-Mac cellular tropism in brain of multiple species.**

| Species                    | Strain or colony of origin                              | Developmental stage | Route of administration                     | Cellular tropism                                |
|----------------------------|---------------------------------------------------------|---------------------|---------------------------------------------|-------------------------------------------------|
| <i>Mus musculus</i>        | C57BL/6J (The Jackson Laboratory)                       | P0                  | Intravenous (temporal vein)                 | Non-specific (astrocytes, neurons, vasculature) |
| <i>Mus musculus</i>        | C57BL/6J, BALB/cJ, DBA/2J (The Jackson Laboratory)      | Adult (6-8 weeks)   | Intravenous (retro-orbital sinus)           | Vasculature                                     |
| <i>Mus musculus</i>        | C57BL/6J, BALB/cJ, DBA/2J (The Jackson Laboratory)      | Adult (6-8 weeks)   | Intracerebroventricular (lateral ventricle) | Neuronal                                        |
| <i>Callithrix jacchus</i>  | UC San Diego (La Jolla, CA)                             | Adult               | Intravenous (saphenous vein)                | Vasculature                                     |
| <i>Macaca mulatta</i>      | California National Primate Research Center (Davis, CA) | Infant              | Intravenous (saphenous vein)                | Neuronal                                        |
| <i>Macaca mulatta</i>      | California National Primate Research Center (Davis, CA) | Infant              | Intra-cisterna magna                        | Neuronal                                        |
| <i>Chlorocebus sabaeus</i> | Virscio (St. Kitts)                                     | Infant              | Intravenous (saphenous vein)                | Neuronal                                        |
| <i>Macaca mulatta</i>      | California National Primate Research Center (Davis, CA) | Adult               | Intravenous (saphenous vein)                | Astrocyte-biased                                |

**Supplementary Table 2: Assessment of tissue by an independent pathologist.**

| Animal ID | Capsid         | Cargo                                                         | Route of administration | Tissue                            | Degeneration score | Inflammation score |
|-----------|----------------|---------------------------------------------------------------|-------------------------|-----------------------------------|--------------------|--------------------|
| RM-001    | 8 capsid pool* | CAG-FXN-HA-Barcode                                            | Intravenous             | Brain                             | 1                  | -                  |
| RM-002    | 8 capsid pool* | CAG-FXN-HA-Barcode                                            | Intravenous             | Brain                             | 0                  | 1                  |
| RM-009    | AAV.CAP-Mac    | CAG-mNeonGreen,<br>CAG-mRuby2,<br>CAG-mTurquoise2<br>cocktail | Intravenous             | Brain                             | 0                  | 0                  |
|           |                |                                                               |                         | Liver                             | 0                  | 1                  |
|           |                |                                                               |                         | Kidney                            | 0                  | 0                  |
|           |                |                                                               |                         | Spinal cord & dorsal root ganglia | 0                  | 0                  |
| RM-010    | AAV.CAP-Mac    | CAG-mNeonGreen,<br>CAG-mRuby2,<br>CAG-mTurquoise2<br>cocktail | Intravenous             | Brain                             | 1                  | 1                  |
| RM-010    |                |                                                               |                         | Liver                             | 0                  | 1                  |
| RM-010    |                |                                                               |                         | Kidney                            | 0                  | 0                  |
| RM-010    |                |                                                               |                         | Spinal cord & dorsal root ganglia | 1                  | 1                  |

\*8 capsid pool consisted of AAV9, PHP.eB, 452sub-LUNG1, CAP-B2, CAP-B10, CAP-B22, CAP-Mac, CAP-C2.

Degeneration and inflammation were scored on a scale from 0 (no observed pathology) to 5.

**Supplementary Table 3: Marmoset information for dual-injection characterization of CAP-Mac.**

| Marmoset ID | Age (years) | Sex    | Route of administration | Capsid*                     | Cargo*                         | Weight at injection (kg) | Total dose (vg/kg)   | Expression length (days) |
|-------------|-------------|--------|-------------------------|-----------------------------|--------------------------------|--------------------------|----------------------|--------------------------|
| Sandy       | 5.8         | Female | Intravenous             | (1) AAV9<br>(2) AAV.CAP-Mac | (1) CAG-eGFP<br>(2) CAG-mRuby3 | 0.468                    | 2 x 10 <sup>13</sup> | 31                       |
| Conan       | 2.8         | Male   | Intravenous             | (1) AAV.CAP-Mac<br>(2) AAV9 | (1) CAG-eGFP<br>(2) CAG-mRuby3 | 0.386                    | 2 x 10 <sup>13</sup> | 31                       |

All experiments were performed in the Cortical Systems and Behavior Laboratory at UCSD.

\*Numbers in "Capsid" and "Cargo" column correspond to capsid-cargo pairs for each dual injection.

**Supplementary Table 4: Rhesus macaque information for variant pool testing.**

| Macaque ID | Age       | Sex    | Route of administration | Weight at injection (kg) | Total dose (vg/kg)   | Expression length (days) |
|------------|-----------|--------|-------------------------|--------------------------|----------------------|--------------------------|
| RM-001     | 1 day     | Male   | Intravenous             | 0.602                    | $1 \times 10^{14}$   | 31                       |
| RM-002     | 1 day     | Male   | Intravenous             | 0.454                    | $1 \times 10^{14}$   | 31                       |
| RM-003     | 150 days  | Female | Intra-cisterna magna    | 1.407                    | $1.5 \times 10^{12}$ | 55                       |
| RM-004     | 150 days  | Female | Intra-cisterna magna    | 1.307                    | $1.5 \times 10^{12}$ | 55                       |
| RMN-001    | 7.9 years | Male   | Intravenous             | 5.3                      | $7.5 \times 10^{13}$ | 40                       |
| RMN-002    | 7.8 years | Female | Intravenous             | 4.65                     | $7.5 \times 10^{13}$ | 41                       |

*RMN-001 and RMN-002 experiments were performed at the NIMH. All other experiments were performed at the California National Primate Research Center at UC Davis. All macaques were injected with pool of 8 variants (AAV9, PHP.eB, 452sub-LUNG1, CAP-B2, CAP-B10, CAP-B22, CAP-Mac, CAP-C2) packaging CAG-hFXN-HA-Barcode.*

**Supplementary Table 5: Rhesus macaque information for characterization of CAP-Mac.**

| Macaque ID | Age        | Sex    | Route of administration | Capsid*                     | Cargo*                                               | Weight at injection (kg) | Total dose (vg/kg)     | Expression length (days) |
|------------|------------|--------|-------------------------|-----------------------------|------------------------------------------------------|--------------------------|------------------------|--------------------------|
| RM-008     | 29 days    | Male   | Intra-cisterna magna    | AAV.CAP-Mac                 | CAG-GCaMP7s                                          | 0.74                     | 2.5 x 10 <sup>13</sup> | 68                       |
| RM-009     | 2 days     | Male   | Intravenous             | AAV.CAP-Mac                 | CAG-mNeonGreen, CAG-mRuby2, CAG-mTurquoise2 cocktail | 0.956                    | 5 x 10 <sup>13</sup>   | 29                       |
| RM-010     | 2 days     | Male   | Intravenous             | AAV.CAP-Mac                 | CAG-mNeonGreen, CAG-mRuby2, CAG-mTurquoise2 cocktail | 0.522                    | 5 x 10 <sup>13</sup>   | 77                       |
| RM-015     | 3 days     | Male   | Intravenous             | AAV.CAP-Mac                 | CAG-GCaMP8s and hSyn-hM3D(Gq)-mCherry cocktail       | 0.635                    | 4 x 10 <sup>13</sup>   | 34                       |
| RM-017     | 1 day      | Female | Intravenous             | AAV.CAP-Mac                 | CAG-GCaMP8s and CAG-ChRmine-TS-mRuby3 cocktail       | 0.46                     | 4 x 10 <sup>13</sup>   | 43                       |
| RM-020     | 17.2 years | Female | Intravenous             | (1) AAV.CAP-Mac<br>(2) AAV9 | (1) CAG-eGFP<br>(2) CAG-mRuby3                       | 11.04                    | 2 x 10 <sup>13</sup>   | 43                       |

All experiments were performed at the California National Primate Research Center at UC Davis. \*Numbers in "Capsid" and "Cargo" column correspond to capsid-cargo pairs for each dual injection.

**Supplementary Table 6: Green monkey information for individual characterization of CAP-Mac.**

| Green monkey ID | Age (days) | Sex  | Route of administration | Capsid      | Cargo    | Weight at injection (kg) | Total dose (vg/kg)     | Expression length (days) |
|-----------------|------------|------|-------------------------|-------------|----------|--------------------------|------------------------|--------------------------|
| C010            | 200        | Male | Intravenous             | AAV.CAP-MAC | CAG-EGFP | 1.18                     | 7.5 x 10 <sup>13</sup> | 36                       |
| C017            | 172        | Male | Intravenous             | AAV.CAP-MAC | CAG-EGFP | 1.32                     | 7.6 x 10 <sup>13</sup> | 36                       |
| C002            | 215        | Male | Intravenous             | AAV9        | CAG-EGFP | 1.31                     | 7.5 x 10 <sup>13</sup> | 36                       |
| C016            | 178        | Male | Intravenous             | AAV9        | CAG-EGFP | 1.02                     | 7.6 x 10 <sup>13</sup> | 37                       |

All experiments were performed at Virscio, Inc.
